# Supplementary material
Source: publisher figshare collection journal article supplement (https://gsajournals.figshare.com/ndownloader/files/27925617)
Supplement: Supplementary file 1 [file 27925617]

## Sheet: Table S4
Table S4. The splicing patterns of NPF genes.
AS Type	GeneID	Gene_symbol	IncLevel_NN-R1	IncLevel_NN-R2	IncLevel_NN-R3	IncLevel_NL-R1	IncLevel_NL-R2	IncLevel_NL-R3	IncLevel_NH-R1	IncLevel_NH-R2	IncLevel_NH-R3
RI	Glyma.03G227500	NPF4.6	1	1	1	0.955	0.98	1	1	1	1
RI	Glyma.14G138200	NPF1.2	0	0	0	0.017	0	0.021	0	0	0
RI	Glyma.08G148000	NPF8.3	0.391	0.319	0.548	0.244	0.3	0.263	0.636	0.263	0.407
RI	Glyma.14G191300	NPF8.1	1	1	1	0.883	1	1	1	1	1
RI	Glyma.05G070600	NPF7.3	0.231	0.395	0.325	0.56	0.765	0.188	0.206	0.191	0.279
RI	Glyma.08G204000	NPF1.2	1	1	1	0.728	1	NA	1	1	1
SE	Glyma.08G148000	NPF8.3	0.85	0.771	0.913	0.915	0.917	1	1	1	0.933
SE	Glyma.05G029900	NPF4.6	1	1	1	1	1	1	NA	0	1
SE	Glyma.06G036200	NPF4.6	0.757	0.66	0.741	0.677	0.779	0.793	0.739	0.791	0.686
SE	Glyma.14G191300	NPF8.1	0.572	0.667	0.401	0.667	1	0.667	1	1	1
A3SS	MSTRG.13627	NPF8.3	0.646	0.788	0.872	0.644	0.788	0.743	0.627	0.525	0.716
A3SS	Glyma.08G148000	NPF8.3	0.806	0.742	0.913	0.875	0.905	1	1	1	0.917
A3SS	Glyma.11G031500	NPF6.3	0.216	0.163	0.205	0.187	0.175	0.161	0.158	0.129	0.129
A3SS	Glyma.05G070600	NPF7.3	0.589	0.709	0.643	0.824	1	0.881	0.668	0.589	0.664
A3SS	Glyma.04G082700	NPF1.2	0.437	1	1	0.633	0.463	1	0.178	0.393	0.341
